# Supplementary material for: Ellagic Acid Suppresses the Oxidative Stress Induced by Dietary‐Oxidized Tallow
Source: Hindawi journal article supplement (doi:10.1155/2018/7408370), 2018-01-01
Supplement: f1 [file 7408370.f1.pdf]

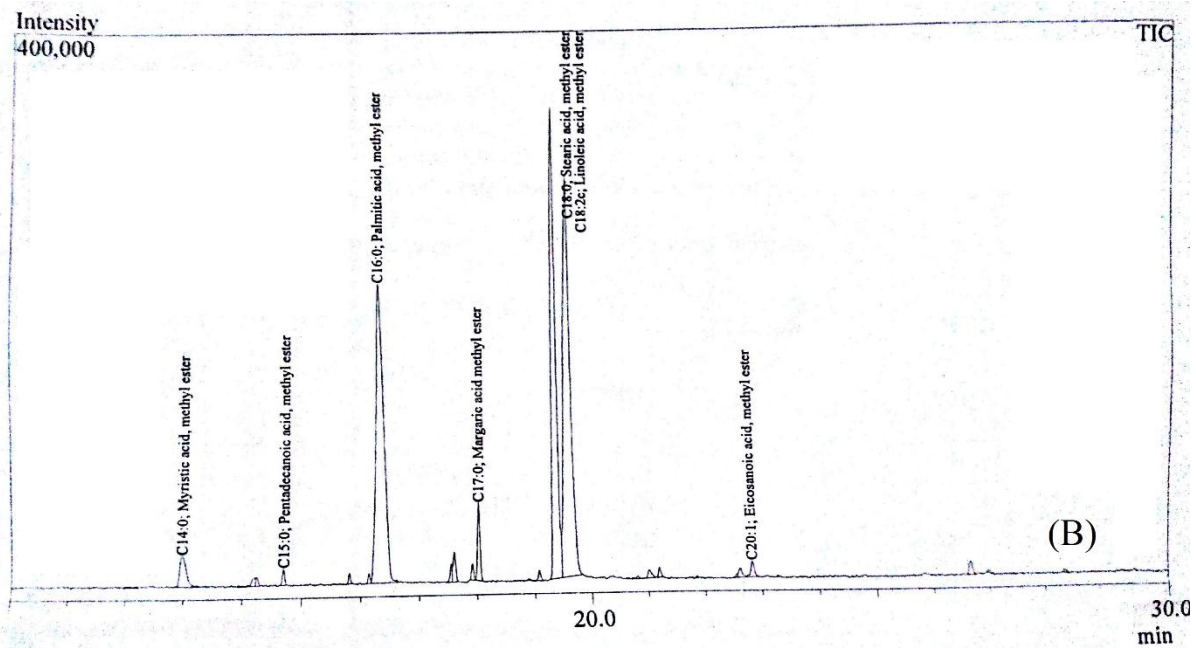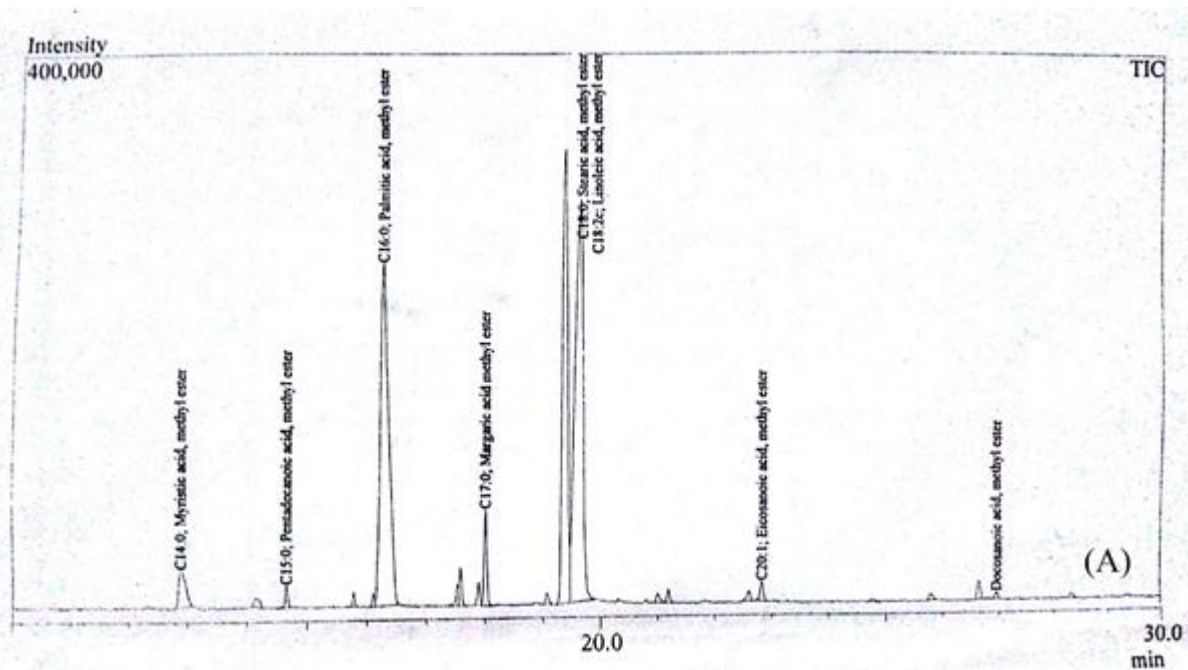

Supplementary Figure. Representative total ion chromatogram (TIC) of fatty acids using GC-MS of tallow (A) control tallow, and (B) oxidized tallow.
